# Supplementary material
Source: Research Square preprint supplement (doi:10.21203/rs.3.rs-9633381/v1)
Supplement: Supplementary file 1 [file 526683a441cbc6ffa4d2c70a.docx]

Supplementary Table 5. Proportion of mothers who smoked by mother's social class

| Mother's social class | Smoking status | Proportion | Percent |
| --- | --- | --- | --- |
| Social class I | no | 0.6451030 | 64.5% |
| Social class I | yes | 0.3548970 | 35.5% |
| Social class II | no | 0.7102394 | 71.0% |
| Social class II | yes | 0.2897606 | 29.0% |
| Social class III | no | 0.5390386 | 53.9% |
| Social class III | yes | 0.4609614 | 46.1% |
| Social class IV | no | 0.5812606 | 58.1% |
| Social class IV | yes | 0.4187394 | 41.9% |
| Social class V | no | 0.5286564 | 52.9% |
| Social class V | yes | 0.4713436 | 47.1% |
| No job | no | 0.6136981 | 61.4% |
| No job | yes | 0.3863019 | 38.6% |
