# Supplementary material
Source: Research Square preprint supplement (doi:10.21203/rs.3.rs-9633381/v1)
Supplement: Supplementary file 2 [file 52dcc0b35e86ec74f43bebc7.docx]

Supplementary Table 3: Recoding of n540 (Mum's paid job during pregnancy)

| **Original coding** | **Recoded Social Class** |
| --- | --- |
| (-1.0) "NA" | . - N/A or missing |
| (1.0) "Teachers" | 1 - Social class I |
| (2.0) "Nurses qualified" | 3 - Social class III |
| (3.0) "Bank clerks etc" | 4 - Social class IV |
| (4.0) "Shopkeepers etc" | 3 - Social class III |
| (5.0) "Others in SCI,II" | 2 - Social class II |
| (6.0) "Nurses- not qual" | 3 - Social class III |
| (7.0) "Clerks, typists" | 4 - Social class IV |
| (8.0) "Shop asst, hairdr" | 5 - Social class V |
| (9.0) "Garment workers" | 4 - Social class IV |
| (10.0) "Textile wkr skld" | 3 - Social class III |
| (11.0) "Personal service" | 4 - Social class IV |
| (12.0) "Others in SC III" | 3 - Social class III |
| (13.0) "Machinists" | 4 - Social class IV |
| (14.0) "Textile wkr SCIV" | 4 - Social class IV |
| (15.0) "Personal-SCIV" | 4 - Social class IV |
| (16.0) "Others in SC IV" | 4 - Social class IV |
| (17.0) "Textile-labourer" | 5 - Social class V |
| (18.0) "Personal-SC V" | 5 - Social class V |
| (19.0) "Others in SC V" | 5 - Social class V |
| (20.0) "No job dur preg" | 6 - No job during pregnancy |
| NA | . - N/A or missing |

We recoded mum’s paid job during pregnancy to social class to be able to compare more easily with mother’s husband and mother’s father social class. These classes were partly based on the SOC 2000 Standard Occupational Classification (<https://www.ons.gov.uk/methodology/classificationsandstandards/standardoccupationalclassificationsoc/socarchive>). However, the SOC 2000 uses 9 groups whereas mother’s father and mother’s husband were grouped into 5 social classes. We therefore needed to combine some groups together but attempted to keep occupations which were in separate SOC 2000 groups in separate social classes where appropriate. We also gave consideration to how much prior schooling/training was likely to be needed versus skills which could be picked up on the job.
