# Supplementary material
Source: Research Square preprint supplement (doi:10.21203/rs.3.rs-9633381/v1)
Supplement: Supplementary file 3 [file 7c883695d10bab5656125fc6.docx]

| Supplementary Table 1: Preregistration Deviations Table | | | | | |
| --- | --- | --- | --- | --- | --- |
|  | | | | | |
| **Deviations** | | | | | |
| # | Details | | Original Wording | Deviation Description | Reader Impact |
| 1 | Type | Variables | *“We will parameterize each of the above-listed socioenvironmental outcomes into ordinal categories and compare the mean and standard deviations across each category, with the highest or most well-off category as a reference.”*  The original preregistration plan looked at polygenic scores for schizophrenia as the exposure and socioenvironmental variables as the outcome, parameterized into ordinal categories. | Upon further reflection and conversation, and following the addition of another co-author, we decided that switching the exposure and outcome variables would improve our model. By using polygenic scores as the outcome rather than the exposure, we could run a linear regression model with the socioenvironmental variables all included as exposures into one mutually adjusted model rather than having to run separate models for each variable. This also helped to address concerns regarding multiple testing and multicollinearity within the socioenvironmental variables. Furthermore, we decided to code the exposures as continuous measures wherever possible as in many cases it was difficult to justify the division of data into ordinal categories (e.g. for smoking, number of antenatal visits etc.). Using continuous measures also better preserves the variability of the data compared to collapsing into categories. | The overall impact of these changes on the reader’s interpretation of the results and conclusions is small. As this analysis was focused on testing for associations between schizophrenia polygenic scores and socioenvironmental measures, changing which is the exposure and which is the outcome will not affect whether an association exists. Additionally, by including all variables in one mutually adjusted model the results may be easier to interpret compared to presenting separate models for each of the socioenvironmental measures. Although ordinal categories may seem easy to interpret, using continuous measures where possible avoids creating categories which may be overly vague or arbitrary (high, medium, low, etc.) for readers. Finally, this change was made prior to any models having been run or the results being known so the risk of bias is low. |
| Reason | Miscommunication |
| Timing | After data access |
| 2 | Type | Analysis | *“As our dataset is included in the control sample for this GWAS, we will adjust for sample overlap using EraSOR according to the methods described by Choi et al as a sensitivity analysis (23).”* | We were unable to use EraSOR to correct for sample overlap. EraSOR requires GWAS summary statistics from the target data, which was not feasible as the number of reported schizophrenia cases in NCDS is very small (~10 cases) so would likely lead to unstable models and non-interpretable effect estimates. However, as the degree of overlap between NCDS and the GWAS summary statistics was only among controls and fairly low, based on simulations presented by Choi et al. in the EraSOR paper for binary traits with low population prevalence, we concluded that the risk of PGI inflation due to sample overlap was low. This is additionally described in the manuscript text. | This deviation has a small impact on the reader’s interpretation of the findings. Adjusting for sample overlap was originally planned as a sensitivity analysis, so it does not impact the presentation or interpretation of the main findings. Although it would have been helpful to more objectively test the impact of sample overlap, we were limited in our options given the inability to conduct a GWAS in NCDS. We instead tried to estimate the magnitude and likely impact of this overlap based on the equations and simulations described in the Choi et al paper. |
| Reason | Plan not possible |
| Timing | After data access |
| 3 | Type | Analysis | *“We will generate two PRS, one including all single nucleotide polymorphisms (SNPs) genome-wide, and a second using only SNPs which are significantly associated at the genome level.”* | As we were using LDpred-2 to generate polygenic scores, it was not possible to generate two scores where one included all SNPs and another included only genome-wide significant SNPs. This plan had been chosen based on previous familiarity with generating polygenic scores using traditional clumping and thresholding methods, however LDpred-2 is a Bayesian method which includes all SNPs to produce one optimized score rather than selecting a p-value threshold. | This deviation has a limited impact on the reader’s interpretation of the findings. The original plan would have involved generating two different polygenic scores where one would have been presented as a secondary analysis, however instead we only generated one score which informed the main analysis. Furthermore, LDpred-2 has generally been found to perform better than traditional clumping and thresholding approaches so provides a singular PGI which likely more accurately captures genetic liability to schizophrenia compared to using two scores generated by another method. |
| Reason | Plan not possible |
| Timing | After data access |
| **Unregistered Steps** | | | | | |
| # | Details | | Original Wording | Unregistered Step Description | Reader Impact |
| 1 | Type | Select One | N/A | N/A | N/A |
| Timing | Select One |
| 2 | Type | Select One |  |  |  |
| Timing | Select One |
| 3 | Type | Select One |  |  |  |
| Timing | Select One |

Source: Willroth EC, Atherton OE. Best Laid Plans: A Guide to Reporting Preregistration Deviations. *Adv Methods Pract Psychol Sci*. 2024;7(1). doi:10.1177/25152459231213802
