# Supplementary material
Source: Research Square preprint supplement (doi:10.21203/rs.3.rs-9633381/v1)
Supplement: Supplementary file 4 [file 925db2fef7b97392a2a4432d.docx]

Supplementary Table 2: Socioenvironmental exposure variables included in analysis

| **Concept** | **Variable name in NCDS** | **Variable label in NCDS** |
| --- | --- | --- |
| Socioeconomic position | n492 | Social class mother’s husband |
|  | n526 | Mother’s father’s social class |
|  | n540 | Mum’s paid job during pregnancy* |
| Maternal smoking | n502 | Smoking prior to pregnancy |
|  | n503 | Smoking during pregnancy |
| Region of birth | n0region | Region at PMS (perinatal mortality study) |
| Age | n553 | Mother’s age at last birthday |
|  | n494 | Mother’s husband’s age |
| Parental education | n537 | Was mum at school after min. leaving age |
| Number of previous pregnancies | n504 | Parity |
| Maternal infection during pregnancy | ABNORM04 | Obstetric, pregnancy abnormality - influenza |
|  | ABNORM05 | Obstetric, pregnancy abnormality – German measles |
| Antenatal care | n500 | Week of first antenatal care visit |
|  | n501 | Total number of antenatal care visits |

*Note: We recoded mother’s paid job during pregnancy into one of 5 social classes to align with father and mother’s father’s social class. For further details see Supplementary Table 2.
