# Supplementary material
Source: Research Square preprint supplement (doi:10.21203/rs.3.rs-9633381/v1)
Supplement: Supplementary file 5 [file d0ec40eb39aee8bc6d435d4d.docx]

Supplementary Table 4: Sample characteristics of the non-imputed sample **N = 6,274**1

| **Characteristic** | **N = 6,274**1 |
| --- | --- |
| Schizophrenia PGI | 4.62 (1.01) |
| Social class mother’s husband |  |
| 1-Social_class_I | 277 (4.7%) |
| 2-Social_class_II | 824 (14%) |
| 3-Social_class_III | 3,534 (60%) |
| 4-Social_class_IV | 690 (12%) |
| 5-Social_class_V | 455 (7.7%) |
| 6-Other | 9 (0.2%) |
| 7-No_husband | 136 (2.3%) |
| Unknown (missing) | 349 |
| Social class mother’s father |  |
| 1-Social_class_I | 155 (2.8%) |
| 2-Social_class_II | 804 (14%) |
| 3-Social_class_III | 2,619 (47%) |
| 4-Social_class_IV | 747 (13%) |
| 5-Social_class_V | 669 (12%) |
| 6-Other | 117 (2.1%) |
| 7-No_father | 449 (8.1%) |
| Unknown (missing) | 714 |
| Mum’s paid job during pregnancy |  |
| 1-Social_class_I | 105 (1.8%) |
| 2-Social_class_II | 38 (0.6%) |
| 3-Social_class_III | 374 (6.3%) |
| 4-Social_class_IV | 1,337 (22%) |
| 5-Social_class_V | 423 (7.1%) |
| 6-No_job | 3,705 (62%) |
| Unknown (missing) | 292 |
| Smoking prior to pregnancy |  |
| 0, non-smoker | 3,584 (60%) |
| 7 (midpoint for 5-9 cigarettes daily) | 453 (7.5%) |
| 12 (midpoint for 10-14 cigs daily) | 842 (14%) |
| 17 (midpoint for 15-19 cigs daily) | 823 (14%) |
| 22 (midpoint for 20-24 cigs daily) | 168 (2.8%) |
| 27 (midpoint for 25-29 cigs daily) | 125 (2.1%) |
| 32 (midpoint for 30 or more cigs daily) | 14 (0.2%) |
| Unknown (missing) | 265 |
| Smoking during pregnancy |  |
| 0, non-smoker | 3,998 (67%) |
| 2.5 (midpoint for 1-4 cigarettes daily) | 195 (3.3%) |
| 7 (midpoint for 5-9 cigs daily) | 388 (6.5%) |
| 12 (midpoint for 10-14 cigs daily) | 576 (9.7%) |
| 17 (midpoint for 15-19 cigs daily) | 577 (9.7%) |
| 22 (midpoint for 20-24 cigs daily) | 133 (2.2%) |
| 27 (midpoint for 25-29 cigs daily) | 78 (1.3%) |
| 32 (midpoint for 30 or more cigs daily) | 15 (0.3%) |
| Unknown (missing) | 314 |
| Maternal age at last birthday | 27.43 (5.55) |
| Unknown (missing) | 233 |
| Was mum at school past leaving age? |  |
| 1-Did_not_stay_past_leaving_age | 4,430 (73%) |
| 0-Stayed_past_leaving_age | 1,603 (27%) |
| Unknown (missing) | 241 |
| Parity | 1.23 (1.45) |
| Unknown (missing) | 230 |
| Week of mother’s first antenatal visit | 16.36 (6.49) |
| Unknown (missing) | 352 |
| Total number of antenatal visits | 12.30 (5.45) |
| Unknown (missing) | 311 |
| Husband’s age in years | 30.48 (6.24) |
| Unknown (missing) | 411 |
| Maternal infection during pregnancy |  |
| 0-No_infec_during_preg | 5,242 (88%) |
| 1-Yes_infec_during_preg | 737 (12%) |
| Unknown (missing) | 295 |
| Child sex at birth |  |
| 1 - Male | 3,125 (50%) |
| 2 - Female | 3,149 (50%) |
| NCDS Region of birth |  |
| E&W Riding | 528 (8.7%) |
| East | 463 (7.7%) |
| Midlands | 621 (10%) |
| North | 479 (7.9%) |
| North Midlands | 493 (8.2%) |
| North West | 732 (12%) |
| Scotland | 650 (11%) |
| South | 357 (5.9%) |
| South East | 1,052 (17%) |
| South West | 354 (5.9%) |
| Wales | 316 (5.2%) |
| Unknown (missing) | 229 |
| 1Mean (SD); n (%) |
